# Supplementary material
Source: publisher site journal article supplement (https://www.dovepress.com/article/471335)
Supplement: Supplementary file 1 [file get_supplementary_file.php]

| **Table 1S. Overview of the positive predictive value of cardiovascular diagnoses in the Danish National Patient Registry (1977–2024), listed chronologically according to ICD-10 coding** | | | | | |
| --- | --- | --- | --- | --- | --- |
| **Diagnoses** | **ICD code** | **Number of studies** | **Number of validated variables** | **Study period range** | **PPV** |
| **Neoplasms (C00–D48)** | | | | | |
| Cardiac tumors | C38 | 1 | 1 | 2010–2012 | 85 |
| **Endocrine, nutritional, and metabolic disease (E00–E90)** | | | | | |
| Hypercholesterolemia | E780 | 1 | 1 | 2010–2012 | 96 |
| **Diseases of the nervous system (G00–G99)** | | | | | |
| Transient ischemic attack | G45 | 3 | 3 | 1994–2020 | 9–68 |
| **Acute rheumatic fever (I00–I02)** | | | | | |
| - | - | 0 | 0 | - | - |
| **Chronic rheumatic heart diseases (I05–I09)** | | | | | |
| - | - | 0 | 0 | - | - |
| **Hypertensive diseases (I10–I15)** | | | | | |
| Hypertension | I10–I15 | 5 | 5 | 1977–2017 | 40–94 |
| **Ischemic heart diseases (I20–I25)** | | | | | |
| Chronic coronary syndrome | I20+I24–I25 | 3 | 6 | 1977–2013 | 4–93 |
| Acute coronary syndrome | I20 | 2 | 4 | 1993–2007 | 66–90 |
| Unstable angina pectoris | I20 | 2 | 2 | 1993–2012 | 28–88 |
| Acute myocardial infarction | I21 | 10 | 18 | 1979–2021 | 42–100 |
| **Pulmonal hypertension (I27)** | | | | | |
| Pulmonal hypertension | I27 | 1 | 1 | 2010–2012 | 87 |
| **Diseases in the pericardium (I30–I32)** | | | | | |
| Pericarditis | I30–I32 | 2 | 2 | 1977–2013 | 92–100 |
| **Endocarditis (I33, I38–I39)** | | | | | |
| Endocarditis | I33 | 3 | 11 | 2007–2017 | 65–87 |
| **Valve diseases (I34–I35)** | | | | | |
| Non-rheumatic valve disease | I34–I35 | 2 | 3 | 1977–2013 | 73–98 |
| **Diseases in the myocardium (I40–I43)** | | | | | |
| Myocarditis | I40 | 1 | 1 | 2010–2012 | 64 |
| Cardiomyopathy | I42–I43 | 3 | 9 | 1977–2014 | 17–100 |
| **Arrhythmia (I44–I49)** | | | | | |
| Bradycardia | I44 | 1 | 1 | 2010–2012 | 87 |
| Arrhythmia | I44–I45 + I47–I49 | 1 | 1 | 1977–2013 | 69 |
| Cardiac arrest | I46 | 2 | 2 | 1993–2012 | 50–94 |
| Ventricular tachycardia or fibrillation | I47 | 1 | 1 | 2010–2012 | 80 |
| Atrial fibrillation or flutter | I48 | 4 | 5 | 1977–2012 | 50–99 |
| **Heart failure (I50)** | | | | | |
| Heart failure | I50 | 8 | 20 | 1998–2022 | 12–100 |
| **Cerebrovascular diseases (I60–I69)** | | | | | |
| Non-traumatic bleeding | I60 | 1 | 8 | 2019 | 69–100 |
| Cerebrovascular diseases | I60–I69 | 4 | 6 | 1994–2020 | 6–94 |
| Stroke overall | I60–I64 | 8 | 15 | 1980–2020 | 39–97 |
| Ischemic stroke | I63 | 4 | 4 | 1980–2020 | 78–100 |
| Hemorrhagic stroke | I60–I62 | 11 | 24 | 1977–2020 | 6–93 |
| Unspecified stroke | I64 | 4 | 4 | 1994–2020 | 50–80 |
| Moyamoya disease | I675 | 1 | 1 | 1994–2007 | 87 |
| **Diseases of arteries, arterioles, and capillaries (I70–I79)** | | | | | |
| Atherosclerosis | I70 | 2 | 7 | 1993–2009 | 59–100 |
| Aortic aneurysm and dissection | I710–I711 | 2 | 6 | 1996–2016 | 64–100 |
| Other peripheral vascular disease | I73 | 2 | 2 | 1993–2012 | 70–91 |
| **Diseases of veins, lymphatic vessels, lymph nodes, not elsewhere classified, and pulmonary embolism (I80–I89 + I26)** | | | | | |
| Pulmonary embolism | I26 | 5 | 6 | 1980–2014 | 30–91 |
| Deep venous thrombosis | I80–I89 | 5 | 7 | 1980–2014 | 32–90 |
| Venous thromboembolism | I80–I89 | 9 | 17 | 1980–2014 | 7–100 |
| Stroke complications | I829A–E | 1 | 1 | 2003–2006 | 76 |
| **Other and unspecified disorders of the circulatory system (I95–I99)** | | | | | |
| - |  | 0 | 0 | - | - |
| **Pregnancy, childbirth, and puerperium (O00**–**O99)** | | | | | |
| Hypertensive disorders of pregnancy | O13 | 3 | 4 | 1982–2012 | 29–89 |
| Peripartum cardiomyopathy or heart failure | O903 | 1 | 2 | 2005–2014 | 30–96 |
| **Congenital malformations, deformations, and chromosomal abnormalities (Q00**–**Q99)** | | | | | |
| Congenital cardiac malformations | Q20 | 3 | 3 | 1991–2008 | 88–98 |
| **Symptoms, signs, abnormal clinical, and laboratory findings, not elsewhere classified (R00**–**R99)** | | | | | |
| Syncope | R559 | 1 | 2 | 2007–2010 | 93–96 |
| Shock | R570–R572 | 1 | 4 | 2005–2012 | 69–94 |
| **Injury, poisoning, and certain other consequences of external causes (S00**–**T98)** | | | | | |
| Post-surgical VTE, DVT, and PE | T817 | 1 | 3 | 2009–2019 | 83–90 |
| Stent thrombosis | T823D, T823E | 1 | 1 | 2010–2012 | 92 |

*Abbreviations: A=primary diagnosis; B=secondary diagnosis; DVT=deep venous embolism; PE=pulmonary embolism; PPV=positive predictive value; VTE=venous thromboembolism

| **Table 2S. Overview of the positive predictive value of cardiovascular treatments and examinations in the Danish National Patient Registry (1977–2024), listed chronologically according to treatment and examination coding** | | | | | |
| --- | --- | --- | --- | --- | --- |
| **Treatments and examinations** | **Treatment and examination code** | **Number of studies** | **Number of validated variables** | **Study period range** | **PPV** |
| **Treatment** | | | | | |
| **Surgery** | | | | | |
| Intra-aortic balloon pump | KFG00 | 1 | 1 | 2017–2022 | 43 |
| Mitral valve surgery | KFK | 1 | 1 | 2010–2012 | 100 |
| Aortic valve surgery | KFM | 1 | 1 | 2010–2012 | 99 |
| Coronary artery bypass grafting | KFNA**–**KFNE, KFNH20 | 1 | 1 | 2010–2012 | 98 |
| Heart transplantation | KFOA | 2 | 2 | 2010–2022 | 100 |
| Cardiopulmonary support | KFXD00 | 1 | 1 | 2017–2022 | 100 |
| Impella | KFXL00 | 1 | 1 | 2017–2022 | 38 |
| Left ventricular assist device | KFXL10 | 1 | 1 | 2017–2022 | 100 |
| Right heart catheterization | KTFC00 | 1 | 1 | 2010–2012 | 97 |
| **Procedure** | | | | | |
| Percutaneous coronary intervention | KFNG, LFNF, KFNG05 | 1 | 3 | 2010–2012 | 96–100 |
| Cardiac pacemakers | BFC, KFP, KFPF10, KFPF20, KFPF96 | 1 | 1 | 2010–2012 | 100 |
| Implantable cardiac defibrillator | ­BFCB0, BFCB6, KEPG | 1 | 3 | 2010–2012 | 83–100 |
| Implantable cardioverter defibrillator | BFCB00, BFCB01, BFCB20 | 1 | 1 | 2017–2022 | 97 |
| Cardiac resynchronization therapy defibrillator | BFCB03, BFCB21 | 1 | 1 | 2017–2022 | 88 |
| Cardiac resynchronization therapy pacemaker | BFCB05, BFCB06, BFCA21, BFCA63 | 1 | 1 | 2017–2022 | 96 |
| DC cardioversion | BFFA0 | 1 | 1 | 2010–2012 | 92 |
| Radiofrequency ablation | BFFB | 1 | 1 | 2010–2012 | 100 |
| Inotrope/vasopressor treatment in shock patients | BFHC92 | 1 | 1 | 2005–2012 | 89 |
| Thrombolysis | BOHA1 | 1 | 1 | 2010–2012 | 98 |
| **Examination** | | | | | |
| Coronary angiogram | UXAC85 | 1 | 1 | 2010–2012 | 100 |
| Cardiac CT angiography | UXCC00A | 1 | 1 | 2008–2012 | 100 |
| Echocardiography | UXUC80**–**UXUC81 | 1 | 3 | 2010–2012 | 96–98 |

*Abbreviations: CT= Computed Tomography; PPV=positive predictive value
